# Supplementary material
Source: Royal Society of Chemistry journal article supplement (doi:10.1039/d6ay00644b)
Supplement: d6ay00644b1.pdf [file d6ay00644b1.pdf]

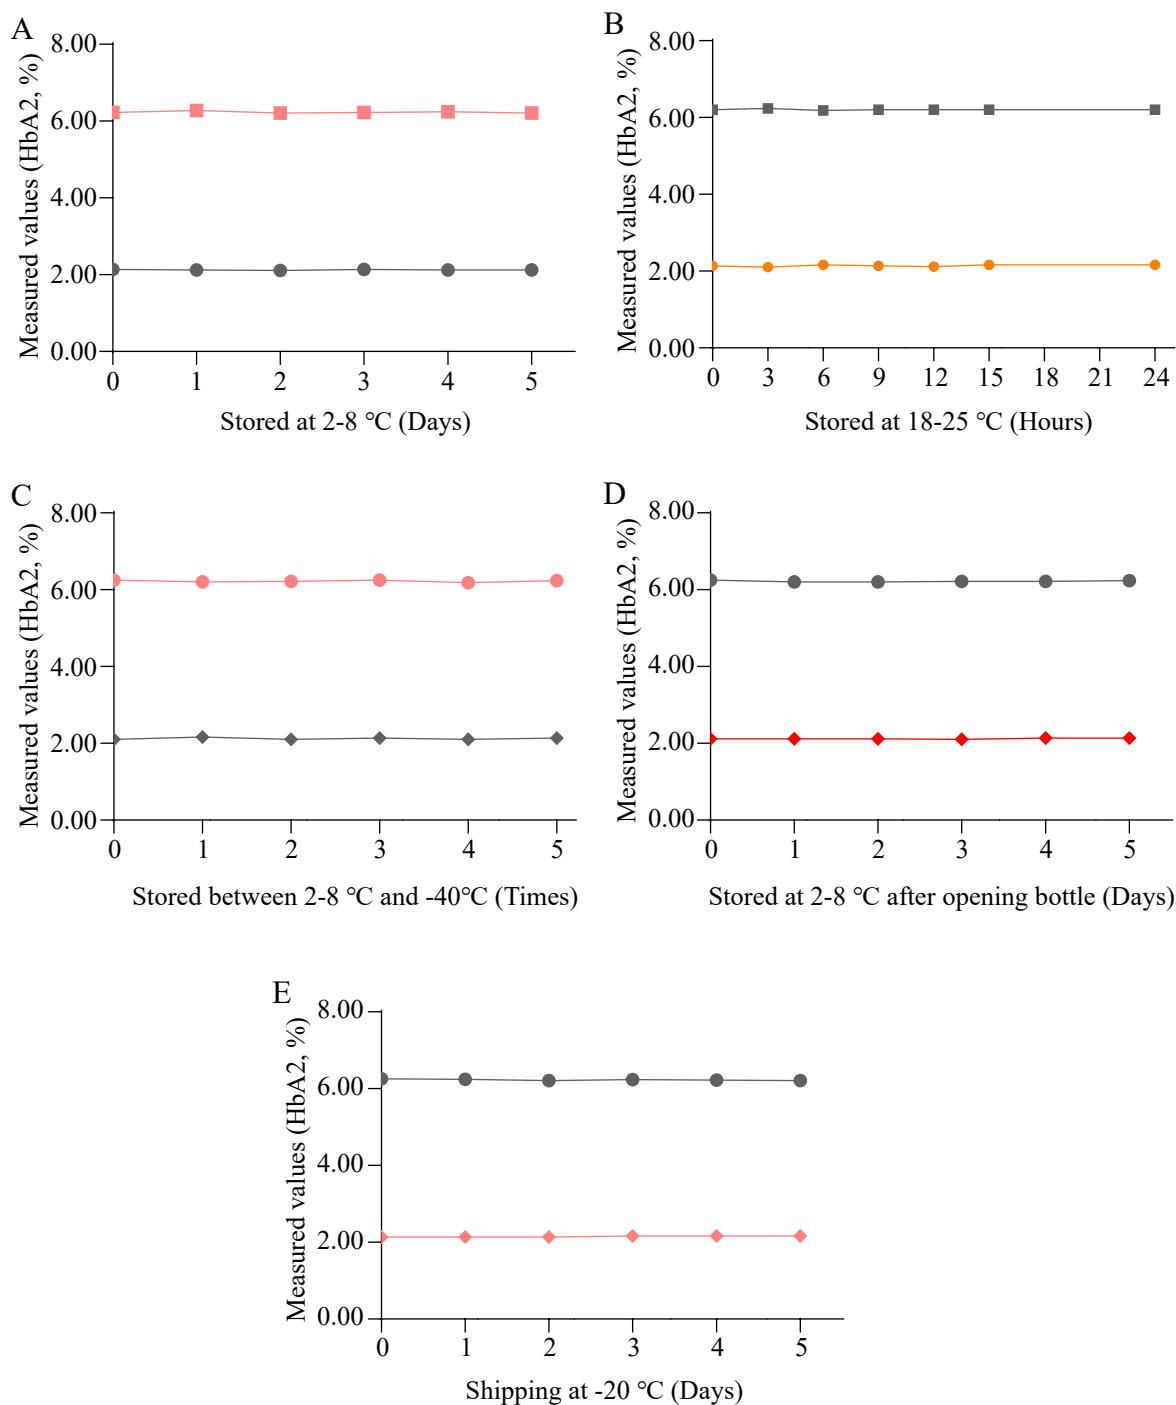

Fig. S1. The short-term stability of HbA2 reference materials under different storage or transportation conditions. (A) Stored at 2°C-8°C for 5 days, (B) Stored at 18°C-25°C for 24 hours, (C) Freeze-thawed between 2°C-8°C and -40°C for 5 times, (D) Opening bottle and stored at 2°C-8°C for 5 days, (E) Shipped at -20°C for 5 days.
