# Supplementary material
Source: Royal Society of Chemistry journal article supplement (doi:10.1039/d6ay00644b)
Supplement: d6ay00644b2.pdf [file d6ay00644b2.pdf]

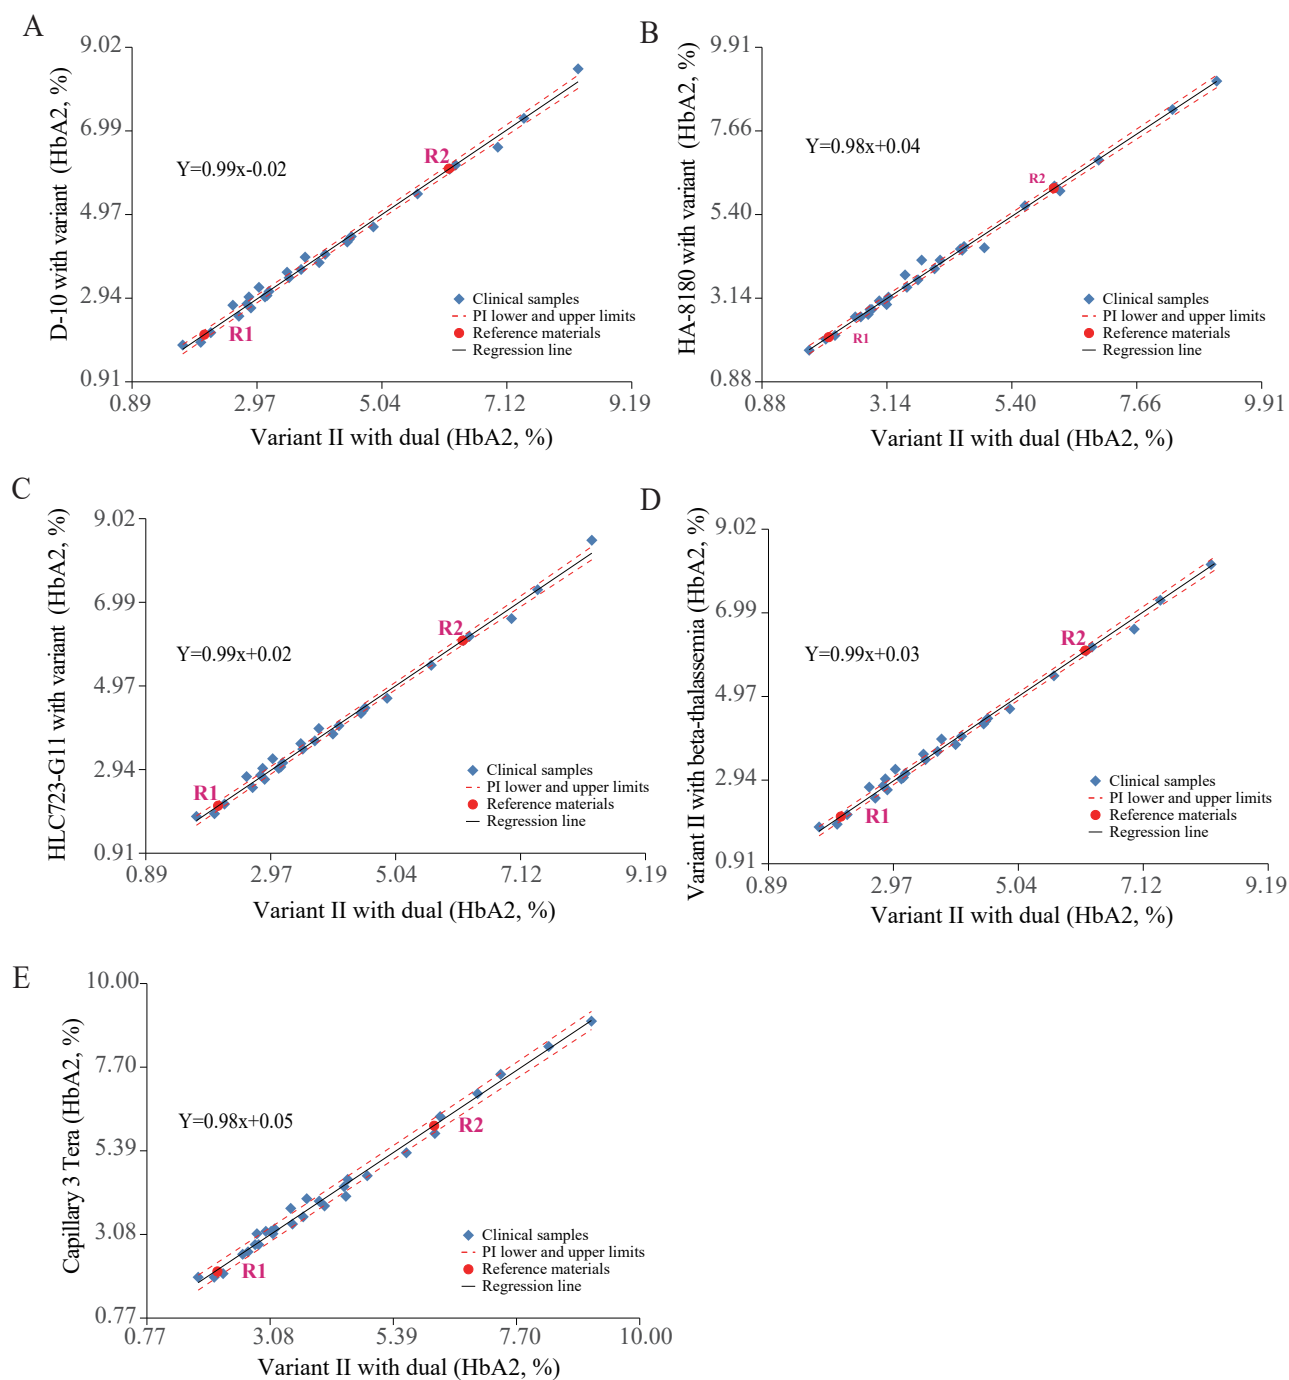

Fig. S2. The commutability of HbA2 reference materials was evaluated between certified value method and routine analyzers via Deming regression. (A) Bio-Rad, D10, (B) ARKRAY, HA-8180, (C) TOSOH, HLC723-G11, (D) Bio-Rad, Variant II with beta-thalassaemia, (E) Sebia, Capillary 3 Tera.
