# Supplementary material
Source: Royal Society of Chemistry journal article supplement (doi:10.1039/d6ay00644b)
Supplement: d6ay00644b7.pdf [file d6ay00644b7.pdf]

Table S1. In the commutability study, description of routine HbA2 assays.

| Manufacturer | Measurement analyzer                                       | Method | Reagents kit | Calibrators | Laboratory name                                                                             |
|--------------|------------------------------------------------------------|--------|--------------|-------------|---------------------------------------------------------------------------------------------|
|              | D-10 Hemoglobin Testing System with beta-thalassemia       | HPLC   | Lirimax      | Bio-Rad     | Sichuan Provincial People's Hospital East Sichuan Hospital & Dazhou First People's Hospital |
| Bio-Rad      | Variant II Hemoglobin Testing System with beta-thalassemia | HPLC   | Lirimax      | Bio-Rad     | The Affiliated Nanhua Hospital                                                              |
|              | Variant II Hemoglobin Testing System with dual             | HPLC   | Bio-Rad      | Bio-Rad     | Lirimax (Tianjin) Medical Technology Co., Ltd.                                              |
| TOSOH        | HLC-723-G11 analyzer with variant model                    | HPLC   | Lirimax      | TOSOH       | Lirimax (Tianjin) Medical Technology Co., Ltd.                                              |
| Arkray       | HA-8180T analyzer with variant model                       | HPLC   | Arkray       | Arkray      | The First People's Hospital of Chengdu's Shuangliu District                                 |
| Sebia        | Capillary 3 Tera                                           | CE     | Sebia        | Arkray      | Tianjin Medical Device Evaluation and Inspection Center                                     |
