# Supplementary material
Source: Royal Society of Chemistry journal article supplement (doi:10.1039/d6ay00644b)
Supplement: d6ay00644b8.pdf [file d6ay00644b8.pdf]

Table S2. Blood samples and reference materials labelled with a number.

| Samples                             | Number                                                                                                                                             |
|-------------------------------------|----------------------------------------------------------------------------------------------------------------------------------------------------|
| Low value HbA2 reference materials  | R1 <sub>S1</sub> , R1 <sub>S2</sub> , R1 <sub>S3</sub> , R1 <sub>S4</sub> , R1 <sub>S5</sub>                                                       |
| High value HbA2 reference materials | R2 <sub>S1</sub> , R2 <sub>S2</sub> , R2 <sub>S3</sub> , R1 <sub>S4</sub> , R2 <sub>S5</sub>                                                       |
| Blood samples                       | S1, S2, S3, S4, S5, S6, S7, S8, S9, S10, S11, S12, S13,<br>S14, S15, S16, S17, S18, S19, S20, S21, S22, S23,<br>S24, S25, S26, S27, S28, S29, S30, |
