# Supplementary material
Source: Royal Society of Chemistry journal article supplement (doi:10.1039/d6ay00644b)
Supplement: d6ay00644b9.pdf [file d6ay00644b9.pdf]

Table S3. Description of HbA2 analytical for Variant II Hemoglobin Testing System.

| Parameters |                       | Measured value |
|------------|-----------------------|----------------|
| Precision  | Intra-assay precision | 1.46%          |
|            | Inter-assay precision | 1.23%          |
| Accuracy   | Low value             | -1.48%         |
|            | High value            | 0.54%          |
| Linearity  |                       | 0.8%-10.20%    |
| Carryover  |                       | 0.00%          |
