# Supplementary material
Source: Royal Society of Chemistry journal article supplement (doi:10.1039/d6ay00644b)
Supplement: d6ay00644b10.pdf [file d6ay00644b10.pdf]

Table S4. Homogeneity characterization of HbA<sub>2</sub> reference materials.

| <i>Samples</i>    | <i>Variation</i> | <i>SS</i> | <i>v</i> | <i>MS</i> | <i>F</i> | <i>n0</i> | <i>S<sub>bb</sub></i> | <i>S<sub>r</sub></i> | <i>CV<sub>between - Bottle</sub></i> | <i>CV<sub>within - Bottle</sub></i> |
|-------------------|------------------|-----------|----------|-----------|----------|-----------|-----------------------|----------------------|--------------------------------------|-------------------------------------|
|                   | Bottle within    | 0.0524    | 14       | 0.0037    |          |           |                       |                      |                                      |                                     |
| <i>Low value</i>  | Bottle between   | 0.0733    | 30       | 0.0024    | 1.53     | 3.0       | 0.0208                | 0.0494               | 0.96%                                | 2.29%                               |
|                   | Sum              | 0.1258    | 44       | —         |          |           |                       |                      |                                      |                                     |
|                   | Bottle within    | 0.0363    | 14       | 0.0026    |          |           |                       |                      |                                      |                                     |
| <i>High value</i> | Bottle between   | 0.0333    | 30       | 0.0011    | 2.34     | 3.0       | 0.0222                | 0.0333               | 0.36%                                | 0.53%                               |
|                   | Sum              | 0.0697    | 44       | —         |          |           |                       |                      |                                      |                                     |
