# Supplementary material
Source: Royal Society of Chemistry journal article supplement (doi:10.1039/d6ay00644b)
Supplement: d6ay00644b11.pdf [file d6ay00644b11.pdf]

Table S5. Stability monitoring of HbA<sub>2</sub> reference materials.

| Category         | Temp (°C)   | Time      | Low value HbA <sub>2</sub> |                           |                                |                                | High value HbA <sub>2</sub> |                           |                                |                                |
|------------------|-------------|-----------|----------------------------|---------------------------|--------------------------------|--------------------------------|-----------------------------|---------------------------|--------------------------------|--------------------------------|
|                  |             |           | Slope                      | Uncertainties<br>of Slope | Cut-off value<br>( $\beta_0$ ) | $t_{0,95-2 \times S}(\beta_1)$ | Slope                       | Uncertainties<br>of Slope | Cut-off value<br>( $\beta_0$ ) | $t_{0,95-2 \times S}(\beta_1)$ |
| Cold storage     | 2-8         | 5 days    | 0.0048                     | 0.0067                    | 2.1233                         | 0.0187                         | 0.0016                      | 0.0061                    | 6.2349                         | 0.0170                         |
| Room temperature | 18-25       | 24 hours  | -0.0038                    | 0.0015                    | 2.1354                         | 0.0042                         | 0.0029                      | 0.0032                    | 6.2169                         | 0.0088                         |
| Shipped          | -20         | 5 days    | 0.0079                     | 0.0050                    | 2.1376                         | 0.0138                         | -0.0038                     | 0.0024                    | 6.2392                         | 0.0067                         |
| Bottle-opening   | 2-8         | 5 days    | 0.0033                     | 0.0029                    | 2.1111                         | 0.0081                         | 0.0100                      | 0.0042                    | 6.1944                         | 0.0118                         |
| Freeze-thaw      | 2-8 and -40 | 5 times   | 0.0041                     | 0.0039                    | 2.1212                         | 0.0107                         | -0.0003                     | 0.0041                    | 6.2286                         | 0.0114                         |
| Long-term        | -70         | 24 months | 0.0025                     | 0.0074                    | 2.1270                         | 0.0206                         | -0.0016                     | 0.0035                    | 6.2206                         | 0.0099                         |
| Long-term        | -20         | 12 months | 0.0051                     | 0.0041                    | 2.1132                         | 0.0115                         | -0.0041                     | 0.0028                    | 6.2344                         | 0.0078                         |
