# Supplementary material
Source: Royal Society of Chemistry journal article supplement (doi:10.1039/d6ay00644b)
Supplement: d6ay00644b12.pdf [file d6ay00644b12.pdf]

Table S6. The relative equivalence of transferring the value of HbA2 reference material on the different analyzers.

| Measurement testing system                                 | Low-value HbA2 reference materials |                        |        | High-value HbA2 reference materials |                        |        |
|------------------------------------------------------------|------------------------------------|------------------------|--------|-------------------------------------|------------------------|--------|
|                                                            | Bias ( <i>D</i> )                  | <i>Ku</i> ( <i>D</i> ) | Passed | Bias ( <i>D</i> )                   | <i>Ku</i> ( <i>D</i> ) | Passed |
| D-10 Hemoglobin Testing System with beta-thalassemia       | -0.5762                            | 1.427                  | Yes    | 0.5465                              | 2.991                  | Yes    |
| Variant II Hemoglobin Testing System with beta-thalassemia | -0.5871                            | 1.429                  | Yes    | 0.5238                              | 2.995                  | Yes    |
| Variant II Hemoglobin Testing System with dual             | -0.5980                            | 1.342                  | Yes    | 0.5007                              | 2.992                  | Yes    |
| HLC-723-G11 analyzer with variant model                    | -0.6035                            | 1.423                  | Yes    | 0.4891                              | 2.984                  | Yes    |
| HA-8180T analyzer with variant model                       | -0.5708                            | 1.432                  | Yes    | 0.5579                              | 3.002                  | Yes    |
| Capillary 3 Tera                                           | -0.5581                            | 1.420                  | Yes    | 0.6035                              | 2.964                  | Yes    |
